# Supplementary material
Source: Springer Nature journal article supplement (https://www.springermedizin.de/resource/supplementary/13075_2004_1655_MOESM10_ESM.pdf/9690272)

total B cells

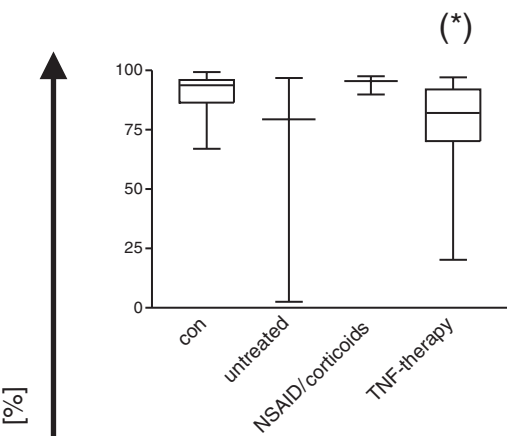

naive B cells

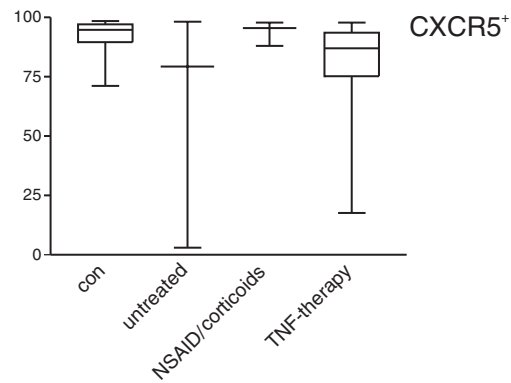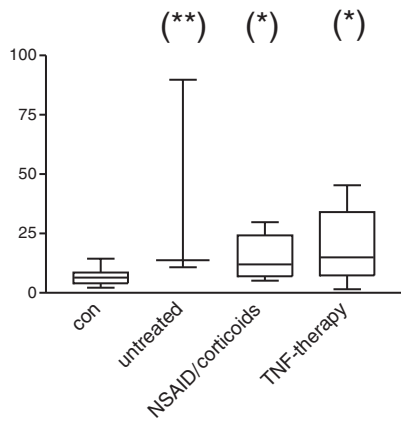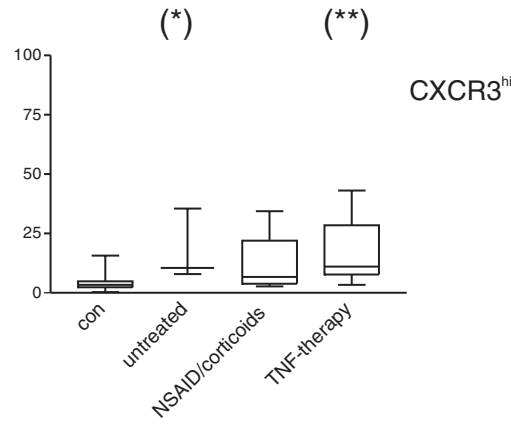

Supplement: MOESM10 [file 9690272]
